# Supplementary figures and images for: Production and Characterization of Rhamnolipids Produced by Pseudomonas aeruginosa DBM 3774: Response Surface Methodology Approach
Source: MDPI journal article supplement (doi:10.3390/microorganisms10071272), 2022-06-22

## Supplementary Materials

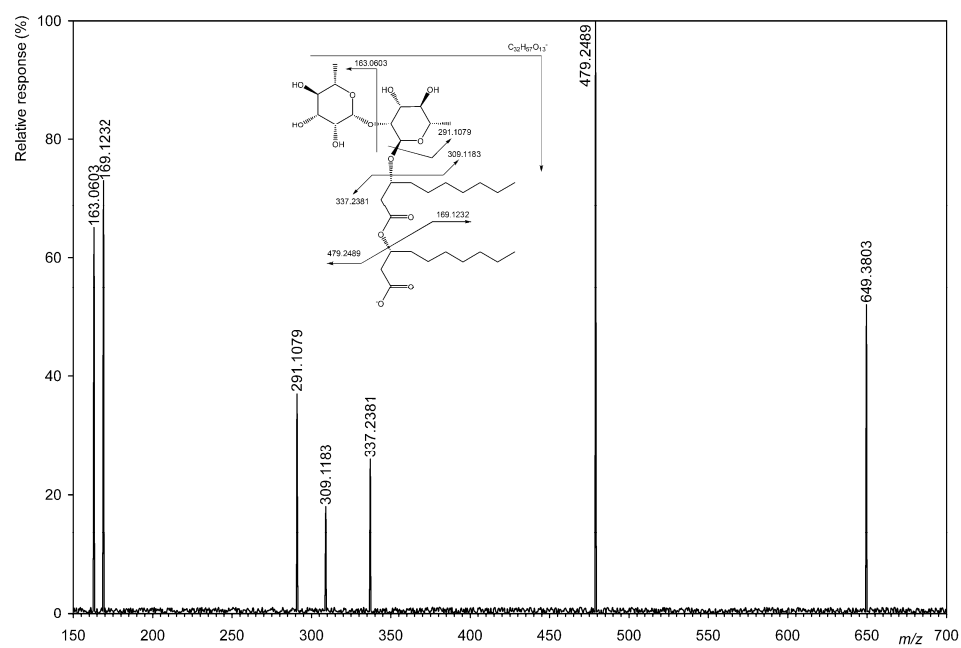

**Figure S1.** Tandem mass spectrum of most abundant rhamnolipid (RhaRha1010).

Supplement: s1 [file s1]
